# Supplementary material
Source: MDPI journal article supplement (https://www.mdpi.com/2673-5636/4/1/13)
Supplement: s1 [file s1]

# Supplementary Material

## Survey Instrument

Before agreeing to take the survey, Amazon Mechanical Turk “workers” were provided the following information:

Title: Attitude Survey

Description: In this short survey (approximately 5 minutes), you will view an image before indicating your level of agreement with a series of statements based on that image and your perception.

Keywords (to search for survey): survey, attitude, opinion, perception

Reward per response: \$0.50

Time allotted: 20 min

After agreeing to take the survey, “workers” received the following prompts:

Survey Instructions: We are conducting a survey about animals. You will view an image of an animal and then indicate your level of agreement with a series of statements. Select the link below to complete the survey. At the end of the survey, you will receive a Respondent ID code to paste into the box below to receive credit for taking our survey.

Make sure to leave this window open as you complete the survey. When you are finished, you will return to this page to paste the Respondent ID code into the box.

For survey statements 1-24, respondents selected from a 4-point Likert scale with the following response choices: “strongly disagree, disagree, agree, strongly agree.” Statement 1 was provided on its own page immediately following image presentation:

- Statement 1: I would like to have a sloth (python) as a pet. [12]

Statements 2-24 were presented in random order on a single page after a response to Statement 1 was provided. Each statement was previously validated in the studies referenced with each below:

- Statement 2: People should have the right to buy and keep a sloth (python) if they want to. [44]
- Statement 3: Allowing people to hold or handle a sloth (python) for a photo opportunity should be banned. [50]
- Statement 4: I would enjoy learning about the ecosystem of wild sloths (pythons). [12]
- Statement 5: I am very interested in learning about wild sloth (python) populations in nature. [12]
- Statement 6: It is important that we learn as much as we can about wildlife. [1]
- Statement 7: I am afraid of sloths (pythons). [12]
- Statement 8: I think sloths (pythons) are unclean and full of disease. [12]
- Statement 9: I do not think sloths (pythons) are smart enough to be trained in a zoo. [12]
- Statement 10: I like to see pictures or watch TV programs depicting animals like sloths (pythons), but I have little desire to see them in the wild. [12]
- Statement 11: I would be thrilled to take a tour in Central/South America (Asia) to see sloths (pythons) in the wild. [12]
- Statement 12: If I were to take a tour in Central/South America (Asia), I would prefer to stay in a modern facility in a city rather than in nature where there might be wild sloths (pythons) around. [12]
- Statement 13: I think love is an emotion that people should feel for other people, not for sloths (pythons). [12]
- Statement 14: I think it is okay if wild animals participate in experiences such as sloth yoga (tourist photos). [12]
- Statement 15: If there are plenty of sloths (pythons) in the wild, I believe people should be allowed to hunt or capture and sell them if it helps improve their livelihood. [12]

- *Statement 16: It harms animals to use them in the media, such as commercials, television programs, or movies. [44]*
- *Statement 17: In my opinion, animals are definitely inferior to humans. [47]*
- *Statement 18: There should be extremely harsh penalties including jail sentences for people who participate activities that result in cruelty to animals. [48]*
- *Statement 19: I am, or could become, very emotionally attached to some of the sloths (pythons) I see at the zoo. [12]*
- *Statement 20: I feel a sense of connection with the animals I see at a zoo. [2]*
- *Statement 21: I do not feel affectionate toward animals I see at a zoo. [7]*
- *Statement 22: Animals in zoos are healthy and comfortable. [46]*
- *Statement 23: Zoo staff provide the animals in their care with a high quality of life. [49]*
- *Statement 24: Keeping sloths (pythons) in zoos, no matter how large and attractive their surroundings are, strikes me as cruel and unusual. [12]*

Demographic questions were provided in set order (see below) and on a separate page at the end of the survey:

- *How many times have you visited any zoo in the past year? (open numerical response)*
- *What is your age? (open numerical response)*
- *Please specify your ethnicity.\**  
     *Caucasian*  
     *Hispanic or Latino*  
     *Black or African American*  
     *Native American or American Indian*  
     *Asian / Pacific Islander*  
     *Other/Multiple*  
     *Prefer not to say*
- *Which of the following best describes your gender?*  
     *Female*  
     *Male*  
     *Other gender*  
     *Prefer to self-describe \_\_\_\_\_*  
     *Prefer not to say*
- *What is the highest degree or level of school you have completed? If currently enrolled, highest degree received.\**  
     *Some high school, no diploma*  
     *High school graduate, diploma or the equivalent (for example: GED)*  
     *Trade/technical/vocational training or Associate's degree*  
     *Bachelor's degree*  
     *Professional or Graduate degree (Masters, Doctorate, MBA, Professional Engineer, etc.)*  
     *Prefer not to say*

\*Standard questions used in previous survey research at the authors' institutions. Since the hypotheses tested in this study were unrelated to these parameters, we do not provide, analyze, or discuss responses to these questions.

## Supplemental Tables

**Table S1.** Self-reported gender identities. While respondents could specify additional gender identities, we used only three categories (male, female, other) to simplify analyses following Lindqvist et al. [59]. Table reproduced from Cronin et al. [26] with permission under the Creative Commons license.

| Study  | Self-reported Gender                  | Frequency |
|--------|---------------------------------------|-----------|
| Sloth  | Female                                | 918       |
| Sloth  | Male                                  | 833       |
| Sloth  | Other gender                          | 3         |
| Sloth  | Prefer to self-describe: genderqueer  | 1         |
| Sloth  | Prefer to self-describe: nebularian   | 1         |
| Sloth  | Prefer to self-describe: nonbinary    | 2         |
| Sloth  | Prefer to self-describe: transman     | 1         |
| Sloth  | Prefer not to say                     | 8         |
| Python | Female                                | 873       |
| Python | Male                                  | 892       |
| Python | Other gender                          | 7         |
| Python | Prefer to self-describe: agender      | 1         |
| Python | Prefer to self-describe: gender fluid | 1         |
| Python | Prefer to self-describe: nonbinary    | 1         |
| Python | Prefer not to say                     | 10        |

**Table S2.** Likelihood ratio test results for four linear regression models. Results for significant predictors ( $p < 0.05$ ) are shown in bold.

| Sloth Positive Attitude Type | F              | df       | P-value          | Python Positive Attitude Type | F              | df       | P-value            |
|------------------------------|----------------|----------|------------------|-------------------------------|----------------|----------|--------------------|
| Fixed Factors                |                |          |                  | Fixed Factors                 |                |          |                    |
| Context                      | 0.3516         | 5        | 0.8814           | Context                       | 1.0023         | 5        | 0.4148             |
| Gender                       | 0.8366         | 2        | 0.4334           | <b>Gender</b>                 | <b>28.4133</b> | <b>2</b> | <b>7.145e-13</b>   |
| <b>Generation</b>            | <b>7.9641</b>  | <b>5</b> | <b>1.965e-07</b> | <b>Generation</b>             | <b>9.9467</b>  | <b>5</b> | <b>2.127e-09</b>   |
| Sloth Negative Attitude Type | F              | df       | P-value          | Python Negative Attitude Type | F              | df       | P-value            |
| Fixed Factors                |                |          |                  | Fixed Factors                 |                |          |                    |
| Context                      | 1.9712         | 5        | 0.07999          | Context                       | 0.1107         | 5        | 0.9900             |
| <b>Gender</b>                | <b>27.1517</b> | <b>2</b> | <b>2.438e-12</b> | <b>Gender</b>                 | <b>38.5748</b> | <b>2</b> | <b>&lt;2.2e-16</b> |
| <b>Generation</b>            | <b>4.0643</b>  | <b>5</b> | <b>0.001135</b>  | <b>Generation</b>             | <b>6.5609</b>  | <b>5</b> | <b>4.661e-06</b>   |

**Table S3.** Linear regression results for the sloth experiment, positive attitude type. The reference levels were “Control” for context, female for gender, and Gen Z for generation. We provide predictor coefficients as well as 95% confidence intervals (Lower-95, Upper-95) and standard error (S.E.).

| Predictor             | Coefficient | Lower-95 | Upper-95 | S.E.   |
|-----------------------|-------------|----------|----------|--------|
| Context_Habitat       | 0.0097      | -0.1394  | 0.1588   | 0.0760 |
| Context_Zoo Keeper    | 0.0545      | -0.0939  | 0.2030   | 0.0757 |
| Context_Perch         | 0.0375      | -0.1111  | 0.1861   | 0.0758 |
| Context_Touch         | 0.0695      | -0.0785  | 0.2175   | 0.0755 |
| Context_Yoga          | 0.0778      | -0.0706  | 0.2261   | 0.0756 |
| Gender_Male           | 0.0151      | -0.0712  | 0.1014   | 0.0440 |
| Gender_Other          | -0.2796     | -0.7325  | 0.1733   | 0.2309 |
| Generation_Millennial | -0.0121     | -0.1734  | 0.1492   | 0.0823 |
| Generation_Gen X      | -0.1976     | -0.3720  | -0.0232  | 0.0889 |
| Generation_Boomer II  | -0.3854     | -0.5935  | -0.1773  | 0.1061 |
| Generation_Boomer     | -0.4718     | -0.7740  | -0.1696  | 0.1541 |
| Generation_Post War   | -0.5471     | -1.2973  | 0.2032   | 0.3825 |

**Table S4.** Linear regression results for the sloth experiment, negative attitude type. The reference levels were “Control” for context, female for gender, and Gen Z for generation. We provide predictor coefficients as well as 95% confidence intervals (Lower-95, Upper-95) and standard error (S.E.).

| Predictor             | Coefficient | Lower-95 | Upper-95 | S.E.   |
|-----------------------|-------------|----------|----------|--------|
| Context_Habitat       | -0.0251     | -0.1746  | 0.1245   | 0.0763 |
| Context_Zoo Keeper    | -0.1176     | -0.2665  | 0.0314   | 0.0759 |
| Context_Perch         | 0.0448      | -0.1043  | 0.1939   | 0.0760 |
| Context_Touch         | 0.0315      | -0.1169  | 0.1800   | 0.0757 |
| Context_Yoga          | 0.1049      | -0.0439  | 0.2537   | 0.0759 |
| Gender_Male           | 0.3169      | 0.2303   | 0.4035   | 0.0442 |
| Gender_Other          | -0.2328     | -0.6870  | 0.2215   | 0.2316 |
| Generation_Millennial | 0.3251      | 0.1632   | 0.4869   | 0.0825 |
| Generation_Gen X      | 0.3065      | 0.1316   | 0.4814   | 0.0892 |
| Generation_Boomer II  | 0.1785      | -0.0303  | 0.3872   | 0.1064 |
| Generation_Boomer     | 0.1467      | -0.1564  | 0.4499   | 0.1546 |
| Generation_Post War   | -0.1883     | -0.9409  | 0.5643   | 0.3837 |

**Table S5.** Linear regression results for the python experiment, positive attitude type. The reference levels were “Control” for context, female for gender, and Gen Z for generation. We provide predictor coefficients as well as 95% confidence intervals (Lower-95, Upper-95) and standard error (S.E.).

| Predictor             | Coefficient | Lower-95 | Upper-95 | S.E.   |
|-----------------------|-------------|----------|----------|--------|
| Context_Habitat       | -0.0095     | -0.1553  | 0.1364   | 0.0744 |
| Context_Zoo Keeper    | 0.1143      | -0.0316  | 0.2601   | 0.0744 |
| Context_Perch         | 0.0834      | -0.0617  | 0.2286   | 0.0740 |
| Context_Touch         | 0.0895      | -0.0554  | 0.2345   | 0.0739 |
| Context_Tourist Photo | 0.0194      | -0.1259  | 0.1647   | 0.0741 |
| Gender_Male           | 0.3132      | 0.2282   | 0.3982   | 0.0433 |
| Gender_Other          | 0.6026      | 0.2012   | 1.0040   | 0.2047 |
| Generation_Millennial | -0.0629     | -0.2108  | 0.0850   | 0.0754 |
| Generation_Gen X      | -0.0963     | -0.2584  | 0.0658   | 0.0827 |
| Generation_Boomer II  | -0.4188     | -0.6148  | -0.2228  | 0.0999 |
| Generation_Boomer     | -0.5846     | -0.8408  | -0.3283  | 0.1306 |
| Generation_Post War   | -1.0088     | -1.6489  | -0.3686  | 0.3264 |

**Table S6.** Linear regression results for the python experiment, negative attitude type. The reference levels were “Control” for context, female for gender, and Gen Z for generation. We provide predictor coefficients as well as 95% confidence intervals (Lower-95, Upper-95) and standard error (S.E.).

| Predictor             | Coefficient | Lower-95 | Upper-95 | S.E.   |
|-----------------------|-------------|----------|----------|--------|
| Context_Habitat       | 0.0364      | -0.1023  | 0.1750   | 0.0707 |
| Context_Zoo Keeper    | 0.0000      | -0.1387  | 0.1387   | 0.0707 |
| Context_Perch         | 0.0225      | -0.1155  | 0.1606   | 0.0704 |
| Context_Touch         | 0.0225      | -0.1154  | 0.1603   | 0.0703 |
| Context_Tourist Photo | 0.0373      | -0.1009  | 0.1755   | 0.0705 |
| Gender_Male           | 0.3367      | 0.2558   | 0.4175   | 0.0412 |
| Gender_Other          | -0.4431     | -0.8248  | -0.0614  | 0.1946 |
| Generation_Millennial | 0.3427      | 0.2021   | 0.4834   | 0.0717 |
| Generation_Gen X      | 0.4223      | 0.2682   | 0.5765   | 0.0786 |
| Generation_Boomer II  | 0.4259      | 0.2395   | 0.6122   | 0.0950 |
| Generation_Boomer     | 0.3551      | 0.1115   | 0.5988   | 0.1242 |
| Generation_Post War   | 0.6520      | 0.0433   | 1.2607   | 0.3103 |

**Table S7.** Pairwise contrasts (estimate) with standard errors (S.E.) between predictor levels for the sloth experiment, with contrasts for the model investigating the positive attitude type on the left and contrasts for the model investigating the negative attitude type on the right. For each predictor, results are averaged over levels of other predictors. p-values were adjusted using the Tukey method for comparing a family of six estimates for context, three estimates for gender, and six estimates for generation. Results for significant contrasts (p<0.05) are shown in bold.

| Positive Attitude Type        |               |               |             |              |                   | Negative Attitude Type    |                |               |             |               |                   |
|-------------------------------|---------------|---------------|-------------|--------------|-------------------|---------------------------|----------------|---------------|-------------|---------------|-------------------|
| Context                       | estimate      | S.E.          | df          | t-ratio      | P-value           | Context                   | estimate       | S.E.          | df          | t-ratio       | P-value           |
| Control - Habitat             | -0.0097       | 0.0760        | 1754        | -0.127       | 1.0000            | Control - Habitat         | 0.0251         | 0.0763        | 1754        | 0.329         | 0.9995            |
| Control - Zoo Keeper          | -0.0545       | 0.0757        | 1754        | -0.720       | 0.9795            | Control - Zoo Keeper      | 0.1175         | 0.0759        | 1754        | 1.548         | 0.6329            |
| Control - Perch               | -0.0375       | 0.0758        | 1754        | -0.495       | 0.9964            | Control - Perch           | -0.0448        | 0.0760        | 1754        | -0.589        | 0.9918            |
| Control - Touch               | -0.0695       | 0.0755        | 1754        | -0.921       | 0.9411            | Control - Touch           | -0.0315        | 0.0757        | 1754        | -0.417        | 0.9984            |
| Control - Yoga                | -0.0778       | 0.0756        | 1754        | -1.028       | 0.9086            | Control - Yoga            | -0.1049        | 0.0759        | 1754        | -1.383        | 0.7376            |
| Habitat - Zoo Keeper          | -0.0448       | 0.0756        | 1754        | -0.593       | 0.9915            | Habitat - Zoo Keeper      | 0.0925         | 0.0758        | 1754        | 1.219         | 0.8276            |
| Habitat - Perch               | -0.0278       | 0.0758        | 1754        | -0.367       | 0.9991            | Habitat - Perch           | -0.0698        | 0.0760        | 1754        | -0.918        | 0.9419            |
| Habitat - Touch               | -0.0599       | 0.0754        | 1754        | -0.793       | 0.9687            | Habitat - Touch           | -0.0566        | 0.0757        | 1754        | -0.748        | 0.9758            |
| Habitat - Yoga                | -0.0681       | 0.0758        | 1754        | -0.898       | 0.9470            | Habitat - Yoga            | -0.1300        | 0.0760        | 1754        | -1.709        | 0.5259            |
| Zoo Keeper - Perch            | 0.0170        | 0.0754        | 1754        | 0.226        | 0.9999            | Zoo Keeper - Perch        | -0.1623        | 0.0756        | 1754        | -2.147        | 0.2636            |
| Zoo Keeper - Touch            | -0.0150       | 0.0750        | 1754        | -0.200       | 1.0000            | Zoo Keeper - Touch        | -0.1491        | 0.0753        | 1754        | -1.980        | 0.3541            |
| Zoo Keeper - Yoga             | -0.0233       | 0.0755        | 1754        | -0.308       | 0.9996            | <b>Zoo Keeper - Yoga</b>  | <b>-0.2224</b> | <b>0.0757</b> | <b>1754</b> | <b>-2.938</b> | <b>0.0392</b>     |
| Perch - Touch                 | -0.0320       | 0.0752        | 1754        | -0.426       | 0.9982            | Perch - Touch             | 0.0132         | 0.0754        | 1754        | 0.175         | 1.0000            |
| Perch - Yoga                  | -0.0403       | 0.0756        | 1754        | -0.532       | 0.9949            | Perch - Yoga              | -0.0601        | 0.0759        | 1754        | -0.792        | 0.9689            |
| Touch - Yoga                  | -0.0082       | 0.0753        | 1754        | -0.109       | 1.0000            | Touch - Yoga              | -0.0734        | 0.0755        | 1754        | -0.971        | 0.9270            |
| Gender                        | estimate      | S.E.          | df          | t-ratio      | P-value           | Gender                    | estimate       | S.E.          | df          | t-ratio       | P-value           |
| Female - Male                 | -0.0151       | 0.0440        | 1754        | -0.343       | 0.9373            | <b>Female - Male</b>      | <b>-0.3170</b> | <b>0.0441</b> | <b>1754</b> | <b>-7.178</b> | <b>&lt;0.0001</b> |
| Female - Other                | 0.2796        | 0.2310        | 1754        | 1.211        | 0.4468            | Female - Other            | 0.2330         | 0.2316        | 1754        | 1.005         | 0.5738            |
| Male - Other                  | 0.2947        | 0.2310        | 1754        | 1.275        | 0.4094            | <b>Male - Other</b>       | <b>0.5500</b>  | <b>0.2318</b> | <b>1754</b> | <b>2.371</b>  | <b>0.0468</b>     |
| Generation                    | estimate      | S.E.          | df          | t-ratio      | P-value           | Generation                | estimate       | S.E.          | df          | t-ratio       | P-value           |
| Gen Z - Millennial            | 0.0121        | 0.0823        | 1754        | 0.147        | 1.0000            | <b>Gen Z - Millennial</b> | <b>-0.3251</b> | <b>0.0825</b> | <b>1754</b> | <b>-3.940</b> | <b>0.0012</b>     |
| Gen Z - Gen X                 | 0.1976        | 0.0889        | 1754        | 2.222        | 0.2281            | <b>Gen Z - Gen X</b>      | <b>-0.3065</b> | <b>0.0892</b> | <b>1754</b> | <b>-3.437</b> | <b>0.0079</b>     |
| <b>Gen Z - Boomer II</b>      | <b>0.3854</b> | <b>0.1061</b> | <b>1754</b> | <b>3.632</b> | <b>0.0039</b>     | Gen Z - Boomer II         | -0.1785        | 0.1064        | 1754        | -1.677        | 0.5474            |
| <b>Gen Z - Boomer</b>         | <b>0.4718</b> | <b>0.1541</b> | <b>1754</b> | <b>3.062</b> | <b>0.0271</b>     | Gen Z - Boomer            | -0.1467        | 0.1546        | 1754        | -0.949        | 0.9335            |
| Gen Z - Post War              | 0.5471        | 0.3825        | 1754        | 1.430        | 0.7086            | Gen Z - Post War          | 0.1883         | 0.3837        | 1754        | 0.491         | 0.9965            |
| <b>Millennial - Gen X</b>     | <b>0.1854</b> | <b>0.0532</b> | <b>1754</b> | <b>3.483</b> | <b>0.0067</b>     | Millennial - Gen X        | 0.0186         | 0.0534        | 1754        | 0.348         | 0.9993            |
| <b>Millennial - Boomer II</b> | <b>0.3733</b> | <b>0.0789</b> | <b>1754</b> | <b>4.734</b> | <b>&lt;0.0001</b> | Millennial - Boomer II    | 0.1466         | 0.0791        | 1754        | 1.853         | 0.4316            |
| <b>Millennial - Boomer</b>    | <b>0.4597</b> | <b>0.1367</b> | <b>1754</b> | <b>3.362</b> | <b>0.0103</b>     | Millennial - Boomer       | 0.1784         | 0.1372        | 1754        | 1.300         | 0.7849            |
| Millennial - Post War         | 0.5349        | 0.3755        | 1754        | 1.424        | 0.7121            | Millennial - Post War     | 0.5134         | 0.3767        | 1754        | 1.363         | 0.7493            |
| Gen X - Boomer II             | 0.1878        | 0.0856        | 1754        | 2.194        | 0.2411            | Gen X - Boomer II         | 0.1280         | 0.0859        | 1754        | 1.491         | 0.6703            |

| Positive Attitude Type |        |        |      |       |        | Negative Attitude Type |        |        |      |       |        |
|------------------------|--------|--------|------|-------|--------|------------------------|--------|--------|------|-------|--------|
| Gen X - Boomer         | 0.2742 | 0.1408 | 1754 | 1.947 | 0.3735 | Gen X - Boomer         | 0.1598 | 0.1413 | 1754 | 1.131 | 0.8684 |
| Gen X - Post War       | 0.3495 | 0.3769 | 1754 | 0.927 | 0.9395 | Gen X - Post War       | 0.4948 | 0.3781 | 1754 | 1.309 | 0.7803 |
| Boomer II - Boomer     | 0.0864 | 0.1522 | 1754 | 0.567 | 0.9931 | Boomer II - Boomer     | 0.0318 | 0.1527 | 1754 | 0.208 | 0.9999 |
| Boomer II - Post War   | 0.1617 | 0.3817 | 1754 | 0.424 | 0.9983 | Boomer II - Post War   | 0.3668 | 0.3828 | 1754 | 0.958 | 0.9309 |
| Boomer - Post War      | 0.0753 | 0.3977 | 1754 | 0.189 | 1.0000 | Boomer - Post War      | 0.3350 | 0.3989 | 1754 | 0.840 | 0.9600 |

**Table S8.** Pairwise contrasts (estimate) with standard errors (S.E.) between predictor levels for the python experiment, with contrasts for the model investigating the positive attitude type on the left and contrasts for the model investigating the negative attitude type on the right. For each predictor, results are averaged over levels of other predictors. p-values were adjusted using the Tukey method for comparing a family of six estimates for context, three estimates for gender, and six estimates for generation. Results for significant contrasts ( $p < 0.05$ ) are shown in bold.

| Positive Attitude Type        |                |               |      |               |                   | Negative Attitude Type     |                |               |      |               |                   |
|-------------------------------|----------------|---------------|------|---------------|-------------------|----------------------------|----------------|---------------|------|---------------|-------------------|
| Context                       | estimate       | S.E.          | df   | t-ratio       | P-value           | Context                    | estimate       | S.E.          | df   | t-ratio       | P-value           |
| Control - Habitat             | 0.0095         | 0.0744        | 1772 | 0.127         | 1.0000            | Control - Habitat          | -0.0364        | 0.0707        | 1772 | -0.515        | 0.9956            |
| Control - Zoo Keeper          | -0.1143        | 0.0744        | 1772 | -1.536        | 0.6407            | Control - Zoo Keeper       | 0.0000         | 0.0707        | 1772 | 0.000         | 1.0000            |
| Control - Perch               | -0.0834        | 0.0740        | 1772 | -1.127        | 0.8702            | Control - Perch            | -0.0225        | 0.0704        | 1772 | -0.320        | 0.9996            |
| Control - Touch               | -0.0896        | 0.0739        | 1772 | -1.211        | 0.8315            | Control - Touch            | -0.0225        | 0.0703        | 1772 | -0.319        | 0.9996            |
| Control - Tourist Photo       | -0.0194        | 0.0741        | 1772 | -0.261        | 0.9998            | Control - Tourist Photo    | -0.0373        | 0.0704        | 1772 | -0.529        | 0.9950            |
| Habitat - Zoo Keeper          | -0.1237        | 0.0743        | 1772 | -1.664        | 0.5557            | Habitat - Zoo Keeper       | 0.0364         | 0.0707        | 1772 | 0.515         | 0.9956            |
| Habitat - Perch               | -0.0929        | 0.0741        | 1772 | -1.254        | 0.8099            | Habitat - Perch            | 0.0138         | 0.0704        | 1772 | 0.196         | 1.0000            |
| Habitat - Touch               | -0.0990        | 0.0740        | 1772 | -1.338        | 0.7639            | Habitat - Touch            | 0.0139         | 0.0704        | 1772 | 0.198         | 1.0000            |
| Habitat - Tourist Photo       | -0.0288        | 0.0742        | 1772 | -0.389        | 0.9989            | Habitat - Tourist Photo    | -0.0009        | 0.0706        | 1772 | -0.013        | 1.0000            |
| Zoo Keeper - Perch            | 0.0308         | 0.0741        | 1772 | 0.416         | 0.9984            | Zoo Keeper - Perch         | -0.0225        | 0.0705        | 1772 | -0.320        | 0.9996            |
| Zoo Keeper - Touch            | 0.0247         | 0.0741        | 1772 | 0.334         | 0.9995            | Zoo Keeper - Touch         | -0.0225        | 0.0704        | 1772 | -0.319        | 0.9996            |
| Zoo Keeper - Tourist Photo    | 0.0949         | 0.0742        | 1772 | 1.278         | 0.7971            | Zoo Keeper - Tourist Photo | -0.0373        | 0.0706        | 1772 | -0.528        | 0.9950            |
| Perch - Touch                 | -0.0061        | 0.0735        | 1772 | -0.083        | 1.0000            | Perch - Touch              | 0.0001         | 0.0699        | 1772 | 0.001         | 1.0000            |
| Perch - Tourist Photo         | 0.0640         | 0.0738        | 1772 | 0.867         | 0.9542            | Perch - Tourist Photo      | -0.0148        | 0.0702        | 1772 | -0.210        | 0.9999            |
| Touch - Tourist Photo         | 0.0702         | 0.0737        | 1772 | 0.952         | 0.9327            | Touch - Tourist Photo      | -0.0148        | 0.0701        | 1772 | -0.212        | 0.9999            |
| Gender                        | estimate       | S.E.          | df   | t-ratio       | P-value           | Gender                     | estimate       | S.E.          | df   | t-ratio       | P-value           |
| Female - Male                 | <b>-0.3130</b> | <b>0.0433</b> | 1772 | <b>-7.228</b> | <b>&lt;0.0001</b> | Female - Male              | <b>-0.3370</b> | <b>0.0412</b> | 1772 | <b>-8.171</b> | <b>&lt;0.0001</b> |
| Female - Other                | <b>-0.6030</b> | <b>0.2047</b> | 1772 | <b>-2.944</b> | <b>0.0092</b>     | Female - Other             | 0.4430         | 0.1946        | 1772 | 2.277         | 0.0594            |
| Male - Other                  | -0.2890        | 0.2043        | 1772 | -1.416        | 0.3327            | <b>Male - Other</b>        | <b>0.7800</b>  | <b>0.1943</b> | 1772 | <b>4.013</b>  | <b>0.0002</b>     |
| Generation                    | estimate       | S.E.          | df   | t-ratio       | P-value           | Generation                 | estimate       | S.E.          | df   | t-ratio       | P-value           |
| Gen Z - Millennial            | 0.0629         | 0.0754        | 1772 | 0.834         | 0.9612            | <b>Gen Z - Millennial</b>  | <b>-0.3428</b> | <b>0.0717</b> | 1772 | <b>-4.780</b> | <b>&lt;0.0001</b> |
| Gen Z - Gen X                 | 0.0963         | 0.0827        | 1772 | 1.165         | 0.8534            | <b>Gen Z - Gen X</b>       | <b>-0.4223</b> | <b>0.0786</b> | 1772 | <b>-5.373</b> | <b>&lt;0.0001</b> |
| <b>Gen Z - Boomer II</b>      | <b>0.4188</b>  | <b>0.0999</b> | 1772 | <b>4.191</b>  | <b>0.0004</b>     | <b>Gen Z - Boomer II</b>   | <b>-0.4259</b> | <b>0.0950</b> | 1772 | <b>-4.482</b> | <b>0.0001</b>     |
| <b>Gen Z - Boomer</b>         | <b>0.5846</b>  | <b>0.1306</b> | 1772 | <b>4.474</b>  | <b>0.0001</b>     | <b>Gen Z - Boomer</b>      | <b>-0.3551</b> | <b>0.1242</b> | 1772 | <b>-2.859</b> | <b>0.0492</b>     |
| <b>Gen Z - Post War</b>       | <b>1.0088</b>  | <b>0.3264</b> | 1772 | <b>3.091</b>  | <b>0.0248</b>     | Gen Z - Post War           | -0.6520        | 0.3103        | 1772 | -2.101        | 0.2872            |
| Millennial - Gen X            | 0.0334         | 0.0534        | 1772 | 0.626         | 0.9892            | Millennial - Gen X         | -0.0796        | 0.0508        | 1772 | -1.567        | 0.6206            |
| <b>Millennial - Boomer II</b> | <b>0.3559</b>  | <b>0.0775</b> | 1772 | <b>4.595</b>  | <b>0.0001</b>     | Millennial - Boomer II     | -0.0831        | 0.0737        | 1772 | -1.129        | 0.8696            |
| <b>Millennial - Boomer</b>    | <b>0.5217</b>  | <b>0.1144</b> | 1772 | <b>4.560</b>  | <b>0.0001</b>     | Millennial - Boomer        | -0.0124        | 0.1088        | 1772 | -0.114        | 1.0000            |
| <b>Millennial - Post War</b>  | <b>0.9458</b>  | <b>0.3202</b> | 1772 | <b>2.954</b>  | <b>0.0374</b>     | Millennial - Post War      | -0.3092        | 0.3045        | 1772 | -1.016        | 0.9128            |
| <b>Gen X - Boomer II</b>      | <b>0.3225</b>  | <b>0.0842</b> | 1772 | <b>3.829</b>  | <b>0.0019</b>     | Gen X - Boomer II          | -0.0036        | 0.0801        | 1772 | -0.044        | 1.0000            |
| <b>Gen X - Boomer</b>         | <b>0.4882</b>  | <b>0.1190</b> | 1772 | <b>4.104</b>  | <b>0.0006</b>     | Gen X - Boomer             | 0.0672         | 0.1131        | 1772 | 0.594         | 0.9915            |



| Positive Attitude Type |        |        |      |       |        | Negative Attitude Type |         |        |      |        |        |
|------------------------|--------|--------|------|-------|--------|------------------------|---------|--------|------|--------|--------|
| Gen X - Post War       | 0.9124 | 0.3220 | 1772 | 2.834 | 0.0527 | Gen X - Post War       | -0.2297 | 0.3062 | 1772 | -0.750 | 0.9755 |
| Boomer II - Boomer     | 0.1657 | 0.1315 | 1772 | 1.260 | 0.8067 | Boomer II - Boomer     | 0.0708  | 0.1251 | 1772 | 0.566  | 0.9932 |
| Boomer II - Post War   | 0.5899 | 0.3268 | 1772 | 1.805 | 0.4627 | Boomer II - Post War   | -0.2261 | 0.3108 | 1772 | -0.728 | 0.9786 |
| Boomer - Post War      | 0.4242 | 0.3375 | 1772 | 1.257 | 0.8084 | Boomer - Post War      | -0.2969 | 0.3210 | 1772 | -0.925 | 0.9402 |

**Table S9.** Likelihood ratio test results for ordinal logistic regression models. Results for significant predictors (p<0.05) are shown in bold.

| <b>Statement 22: Animals in zoos are healthy and comfortable.</b>                                                                                  |                |           |                  |                   |                |           |                  |
|----------------------------------------------------------------------------------------------------------------------------------------------------|----------------|-----------|------------------|-------------------|----------------|-----------|------------------|
| <b>Sloth</b>                                                                                                                                       | $\chi^2$       | <b>df</b> | <b>P-value</b>   | <b>Python</b>     | $\chi^2$       | <b>df</b> | <b>P-value</b>   |
| Fixed Factors                                                                                                                                      |                |           |                  | Fixed Factors     |                |           |                  |
| Context                                                                                                                                            | 2.3239         | 5         | 0.8028           | Context           | 0.895          | 5         | 0.9706           |
| <b>Gender</b>                                                                                                                                      | <b>6.6799</b>  | <b>2</b>  | <b>0.03544</b>   | <b>Gender</b>     | <b>9.635</b>   | <b>2</b>  | <b>0.008088</b>  |
| <b>Generation</b>                                                                                                                                  | <b>22.2122</b> | <b>5</b>  | <b>0.0004771</b> | <b>Generation</b> | <b>44.122</b>  | <b>5</b>  | <b>2.188e-08</b> |
| <b>Statement 23: Zoo staff provide the animals in their care with a high quality of life.</b>                                                      |                |           |                  |                   |                |           |                  |
| <b>Sloth</b>                                                                                                                                       | $\chi^2$       | <b>df</b> | <b>P-value</b>   | <b>Python</b>     | $\chi^2$       | <b>df</b> | <b>P-value</b>   |
| Fixed Factors                                                                                                                                      |                |           |                  | Fixed Factors     |                |           |                  |
| Context                                                                                                                                            | 1.0133         | 5         | 0.9615           | Context           | 3.8749         | 5         | 0.5676           |
| Gender                                                                                                                                             | 2.7800         | 2         | 0.2491           | Gender            | 4.2786         | 2         | 0.1177           |
| Generation                                                                                                                                         | 10.8117        | 5         | 0.05524          | <b>Generation</b> | <b>19.5834</b> | <b>5</b>  | <b>0.001496</b>  |
| <b>Statement 24: Keeping sloths (pythons) in zoos, no matter how large and attractive their surroundings are, strikes me as cruel and unusual.</b> |                |           |                  |                   |                |           |                  |
| <b>Sloth</b>                                                                                                                                       | $\chi^2$       | <b>df</b> | <b>P-value</b>   | <b>Python</b>     | $\chi^2$       | <b>df</b> | <b>P-value</b>   |
| Fixed Factors                                                                                                                                      |                |           |                  | Fixed Factors     |                |           |                  |
| Context                                                                                                                                            | 4.0735         | 5         | 0.5389           | Context           | 1.5955         | 5         | 0.9018           |
| Gender                                                                                                                                             | 2.5196         | 2         | 0.2837           | Gender            | 1.3057         | 2         | 0.5206           |
| Generation                                                                                                                                         | 0.6115         | 5         | 0.9875           | Generation        | 4.0154         | 5         | 0.5472           |

**Table S10.** Ordinal logistic regression results investigating agreement with zoo animal perception questions for the sloth experiment. The reference levels were “Control” for context, female for gender, and Gen Z for generation. We provide predictor coefficients as well as 95% confidence intervals (Lower-95, Upper-95), standard error (S.E.), and exponentiated odds ratios.

| <b>Statement 22: Animals in zoos are healthy and comfortable.</b>                                                                        |                    |                 |                 |             |                   |
|------------------------------------------------------------------------------------------------------------------------------------------|--------------------|-----------------|-----------------|-------------|-------------------|
| <b>Predictor</b>                                                                                                                         | <b>Coefficient</b> | <b>Lower-95</b> | <b>Upper-95</b> | <b>S.E.</b> | <b>Odds Ratio</b> |
| Context_Habitat                                                                                                                          | 0.0046             | -0.3034         | 0.3127          | 0.1571      | 1.0046            |
| Context_Zoo Keeper                                                                                                                       | 0.1196             | -0.1885         | 0.4278          | 0.1572      | 1.1270            |
| Context_Perch                                                                                                                            | 0.0616             | -0.2482         | 0.3714          | 0.1580      | 1.0635            |
| Context_Touch                                                                                                                            | -0.0210            | -0.3285         | 0.2866          | 0.1569      | 0.9793            |
| Context_Yoga                                                                                                                             | -0.1043            | -0.4120         | 0.2033          | 0.1569      | 0.9010            |
| Gender_Male                                                                                                                              | 0.2193             | 0.0395          | 0.3995          | 0.0918      | 1.2452            |
| Gender_Other                                                                                                                             | -0.3694            | -1.3195         | 0.5851          | 0.4824      | 0.6912            |
| Generation_Millennial                                                                                                                    | 0.6757             | 0.3418          | 1.0100          | 0.1703      | 1.9654            |
| Generation_Gen X                                                                                                                         | 0.8030             | 0.4427          | 1.1640          | 0.1839      | 2.2322            |
| Generation_Boomer II                                                                                                                     | 0.5636             | 0.1363          | 0.9923          | 0.2182      | 1.7570            |
| Generation_Boomer                                                                                                                        | 0.5703             | -0.0343         | 1.1798          | 0.3093      | 1.7689            |
| Generation_Post War                                                                                                                      | -0.6116            | -2.3299         | 1.0544          | 0.8516      | 0.5425            |
| <b>Statement 23: Zoo staff provide the animals in their care with a high quality of life.</b>                                            |                    |                 |                 |             |                   |
| <b>Predictor</b>                                                                                                                         | <b>Coefficient</b> | <b>Lower-95</b> | <b>Upper-95</b> | <b>S.E.</b> | <b>Odds Ratio</b> |
| Context_Habitat                                                                                                                          | -0.0062            | -0.3233         | 0.3109          | 0.1618      | 0.9938            |
| Context_Zoo Keeper                                                                                                                       | 0.0442             | -0.2716         | 0.3599          | 0.1611      | 1.0452            |
| Context_Perch                                                                                                                            | -0.0453            | -0.3611         | 0.2704          | 0.1611      | 0.9557            |
| Context_Touch                                                                                                                            | -0.0143            | -0.3288         | 0.3002          | 0.1604      | 0.9858            |
| Context_Yoga                                                                                                                             | -0.1078            | -0.4228         | 0.2072          | 0.1607      | 0.8979            |
| Gender_Male                                                                                                                              | 0.1144             | -0.0691         | 0.2982          | 0.0937      | 1.1212            |
| Gender_Other                                                                                                                             | -0.5364            | -1.5493         | 0.4902          | 0.5184      | 0.5849            |
| Generation_Millennial                                                                                                                    | 0.5287             | 0.1787          | 0.8773          | 0.1782      | 1.6968            |
| Generation_Gen X                                                                                                                         | 0.5420             | 0.1648          | 0.9182          | 0.1921      | 1.7195            |
| Generation_Boomer II                                                                                                                     | 0.3225             | -0.1187         | 0.7634          | 0.2250      | 1.3805            |
| Generation_Boomer                                                                                                                        | 0.3712             | -0.2673         | 1.0140          | 0.3268      | 1.4495            |
| Generation_Post War                                                                                                                      | -0.0876            | -1.7756         | 1.6085          | 0.8565      | 0.9161            |
| <b>Statement 24: Keeping sloths in zoos, no matter how large and attractive their surroundings are, strikes me as cruel and unusual.</b> |                    |                 |                 |             |                   |
| <b>Predictor</b>                                                                                                                         | <b>Coefficient</b> | <b>Lower-95</b> | <b>Upper-95</b> | <b>S.E.</b> | <b>Odds Ratio</b> |
| Context_Habitat                                                                                                                          | 0.0054             | -0.2977         | 0.3086          | 0.1546      | 1.0055            |
| Context_Zoo Keeper                                                                                                                       | -0.0760            | -0.3785         | 0.2265          | 0.1543      | 0.9268            |
| Context_Perch                                                                                                                            | 0.0217             | -0.2824         | 0.3258          | 0.1551      | 1.0219            |
| Context_Touch                                                                                                                            | 0.1965             | -0.1052         | 0.4986          | 0.1540      | 1.2171            |
| Context_Yoga                                                                                                                             | 0.1227             | -0.1805         | 0.4262          | 0.1547      | 1.1306            |
| Gender_Male                                                                                                                              | -0.1099            | -0.2860         | 0.0661          | 0.0898      | 0.8959            |
| Gender_Other                                                                                                                             | -0.5544            | -1.5534         | 0.4212          | 0.5022      | 0.5744            |
| Generation_Millennial                                                                                                                    | -0.0999            | -0.4232         | 0.2248          | 0.1652      | 0.9049            |
| Generation_Gen X                                                                                                                         | -0.1182            | -0.4683         | 0.2329          | 0.1788      | 0.8885            |
| Generation_Boomer II                                                                                                                     | -0.1426            | -0.5622         | 0.2770          | 0.2140      | 0.8671            |
| Generation_Boomer                                                                                                                        | -0.1696            | -0.7720         | 0.4278          | 0.3056      | 0.8440            |
| Generation_Post War                                                                                                                      | -0.0919            | -1.7588         | 1.5177          | 0.8234      | 0.9122            |

**Table S11.** Ordinal logistic regression results investigating agreement with zoo animal perception questions for the python experiment. The reference levels were “Control” for context, female for gender, and Gen Z for generation. We provide predictor coefficients as well as 95% confidence intervals (Lower-95, Upper-95), standard error (S.E.), and exponentiated odds ratios.

| <b>Statement 22: Animals in zoos are healthy and comfortable.</b>                                                                         |                    |                 |                 |             |                   |
|-------------------------------------------------------------------------------------------------------------------------------------------|--------------------|-----------------|-----------------|-------------|-------------------|
| <b>Predictor</b>                                                                                                                          | <b>Coefficient</b> | <b>Lower-95</b> | <b>Upper-95</b> | <b>S.E.</b> | <b>Odds Ratio</b> |
| Context_Habitat                                                                                                                           | 0.0223             | -0.2864         | 0.3310          | 0.1574      | 1.0225            |
| Context_Zoo Keeper                                                                                                                        | 0.0065             | -0.3039         | 0.3171          | 0.1584      | 1.0065            |
| Context_Perch                                                                                                                             | -0.0091            | -0.3150         | 0.2970          | 0.1561      | 0.9910            |
| Context_Touch                                                                                                                             | -0.0024            | -0.3095         | 0.3048          | 0.1567      | 0.9976            |
| Context_Tourist Photo                                                                                                                     | -0.1092            | -0.4189         | 0.2005          | 0.1580      | 0.8966            |
| Gender_Male                                                                                                                               | 0.2722             | 0.0925          | 0.4522          | 0.0917      | 1.3128            |
| Gender_Other                                                                                                                              | -0.2476            | -1.0964         | 0.6114          | 0.4335      | 0.7807            |
| Generation_Millennial                                                                                                                     | 0.8670             | 0.5548          | 1.1800          | 0.1594      | 2.3798            |
| Generation_Gen X                                                                                                                          | 1.1337             | 0.7877          | 1.4810          | 0.1768      | 3.1070            |
| Generation_Boomer II                                                                                                                      | 0.7063             | 0.2999          | 1.1143          | 0.2077      | 2.0265            |
| Generation_Boomer                                                                                                                         | 0.5569             | 0.0247          | 1.0927          | 0.2722      | 1.7452            |
| Generation_Post War                                                                                                                       | 0.4779             | -0.8546         | 1.8241          | 0.6748      | 1.6127            |
| <b>Statement 23: Zoo staff provide the animals in their care with a high quality of life.</b>                                             |                    |                 |                 |             |                   |
| <b>Predictor</b>                                                                                                                          | <b>Coefficient</b> | <b>Lower-95</b> | <b>Upper-95</b> | <b>S.E.</b> | <b>Odds Ratio</b> |
| Context_Habitat                                                                                                                           | 0.0894             | -0.2254         | 0.4044          | 0.1606      | 1.0935            |
| Context_Zoo Keeper                                                                                                                        | 0.0223             | -0.2945         | 0.3391          | 0.1616      | 1.0225            |
| Context_Perch                                                                                                                             | 0.0246             | -0.2879         | 0.3372          | 0.1594      | 1.0249            |
| Context_Touch                                                                                                                             | 0.0152             | -0.2965         | 0.3269          | 0.1590      | 1.0153            |
| Context_Tourist Photo                                                                                                                     | -0.2036            | -0.5194         | 0.1120          | 0.1610      | 0.8158            |
| Gender_Male                                                                                                                               | 0.1767             | -0.0069         | 0.3607          | 0.0937      | 1.1933            |
| Gender_Other                                                                                                                              | -0.2806            | -1.1455         | 0.5948          | 0.4433      | 0.7553            |
| Generation_Millennial                                                                                                                     | 0.5948             | 0.2722          | 0.9169          | 0.1644      | 1.8127            |
| Generation_Gen X                                                                                                                          | 0.4577             | 0.1058          | 0.8092          | 0.1794      | 1.5804            |
| Generation_Boomer II                                                                                                                      | 0.1836             | -0.2373         | 0.6046          | 0.2147      | 1.2015            |
| Generation_Boomer                                                                                                                         | 0.0737             | -0.4750         | 0.6253          | 0.2806      | 1.0765            |
| Generation_Post War                                                                                                                       | 0.2234             | -1.1068         | 1.5848          | 0.6847      | 1.2503            |
| <b>Statement 24: Keeping pythons in zoos, no matter how large and attractive their surroundings are, strikes me as cruel and unusual.</b> |                    |                 |                 |             |                   |
| <b>Predictor</b>                                                                                                                          | <b>Coefficient</b> | <b>Lower-95</b> | <b>Upper-95</b> | <b>S.E.</b> | <b>Odds Ratio</b> |
| Context_Habitat                                                                                                                           | -0.0707            | -0.3691         | 0.2274          | 0.1521      | 0.9317            |
| Context_Zoo Keeper                                                                                                                        | -0.0246            | -0.3267         | 0.2774          | 0.1541      | 0.9757            |
| Context_Perch                                                                                                                             | -0.0260            | -0.3211         | 0.2690          | 0.1505      | 0.9744            |
| Context_Touch                                                                                                                             | -0.0738            | -0.3711         | 0.2233          | 0.1516      | 0.9288            |
| Context_Tourist Photo                                                                                                                     | 0.0923             | -0.2062         | 0.3908          | 0.1523      | 1.0967            |
| Gender_Male                                                                                                                               | -0.0474            | -0.2215         | 0.1266          | 0.0888      | 0.9537            |
| Gender_Other                                                                                                                              | -0.4441            | -1.2683         | 0.3750          | 0.4178      | 0.6414            |
| Generation_Millennial                                                                                                                     | 0.0466             | -0.2562         | 0.3505          | 0.1547      | 1.0477            |
| Generation_Gen X                                                                                                                          | 0.1928             | -0.1398         | 0.5265          | 0.1699      | 1.2127            |
| Generation_Boomer II                                                                                                                      | 0.1847             | -0.2182         | 0.5879          | 0.2056      | 1.2028            |
| Generation_Boomer                                                                                                                         | 0.3680             | -0.1588         | 0.8948          | 0.2685      | 1.4448            |
| Generation_Post War                                                                                                                       | -0.0035            | -1.4143         | 1.4226          | 0.7169      | 0.9965            |

**Table S12.** Pairwise contrasts (estimate) with standard errors (S.E.) between predictor levels for agreement with zoo animal perception statement 22 (Animals in zoos are healthy and comfortable) for the sloth experiment (left) and python experiment (right). For each predictor, results are averaged over levels of other predictors. p-values were adjusted using the Tukey method for comparing a family of six estimates for context, three estimates for gender, and six estimates for generation. Results for significant contrasts ( $p < 0.05$ ) are shown in bold.

| Sloth Experiment       |                |               |               |               | Python Experiment          |                |               |               |                   |
|------------------------|----------------|---------------|---------------|---------------|----------------------------|----------------|---------------|---------------|-------------------|
| Context                | estimate       | S.E.          | z-ratio       | P-value       | Context                    | estimate       | S.E.          | z-ratio       | P-value           |
| Control - Habitat      | -0.0046        | 0.1570        | -0.029        | 1.0000        | Control - Habitat          | -0.0223        | 0.1570        | -0.142        | 1.0000            |
| Control - Zoo Keeper   | -0.1196        | 0.1570        | -0.761        | 0.9740        | Control - Zoo Keeper       | -0.0065        | 0.1580        | -0.041        | 1.0000            |
| Control - Perch        | -0.0616        | 0.1580        | -0.390        | 0.9988        | Control - Perch            | 0.0091         | 0.1560        | 0.058         | 1.0000            |
| Control - Touch        | 0.0210         | 0.1570        | 0.134         | 1.0000        | Control - Touch            | 0.0024         | 0.1570        | 0.015         | 1.0000            |
| Control - Yoga         | 0.1043         | 0.1570        | 0.664         | 0.9858        | Control - Tourist Photo    | 0.1092         | 0.1580        | 0.691         | 0.9830            |
| Habitat - Zoo Keeper   | -0.1149        | 0.1570        | -0.732        | 0.9780        | Habitat - Zoo Keeper       | 0.0158         | 0.1570        | 0.100         | 1.0000            |
| Habitat - Perch        | -0.0570        | 0.1580        | -0.360        | 0.9992        | Habitat - Perch            | 0.0313         | 0.1550        | 0.202         | 1.0000            |
| Habitat - Touch        | 0.0256         | 0.1570        | 0.163         | 1.0000        | Habitat - Touch            | 0.0247         | 0.1560        | 0.158         | 1.0000            |
| Habitat - Yoga         | 0.1089         | 0.1570        | 0.693         | 0.9828        | Habitat - Tourist Photo    | 0.1314         | 0.1570        | 0.836         | 0.9609            |
| Zoo Keeper - Perch     | 0.0580         | 0.1580        | 0.367         | 0.9991        | Zoo Keeper - Perch         | 0.0155         | 0.1560        | 0.099         | 1.0000            |
| Zoo Keeper - Touch     | 0.1405         | 0.1570        | 0.896         | 0.9475        | Zoo Keeper - Touch         | 0.0089         | 0.1570        | 0.057         | 1.0000            |
| Zoo Keeper - Yoga      | 0.2238         | 0.1570        | 1.424         | 0.7127        | Zoo Keeper - Tourist Photo | 0.1156         | 0.1580        | 0.731         | 0.9782            |
| Perch - Touch          | 0.0825         | 0.1580        | 0.523         | 0.9953        | Perch - Touch              | -0.0067        | 0.1540        | -0.043        | 1.0000            |
| Perch - Yoga           | 0.1658         | 0.1580        | 1.048         | 0.9017        | Perch - Tourist Photo      | 0.1001         | 0.1560        | 0.642         | 0.9878            |
| Touch - Yoga           | 0.0833         | 0.1570        | 0.531         | 0.9949        | Touch - Tourist Photo      | 0.1068         | 0.1560        | 0.683         | 0.9839            |
| Gender                 | estimate       | S.E.          | z-ratio       | P-value       | Gender                     | estimate       | S.E.          | z-ratio       | P-value           |
| Female - Male          | <b>-0.2190</b> | <b>0.0918</b> | <b>-2.389</b> | <b>0.0445</b> | Female - Male              | <b>-0.2720</b> | <b>0.0917</b> | <b>-2.966</b> | <b>0.0085</b>     |
| Female - Other         | 0.3690         | 0.4824        | 0.766         | 0.7242        | Female - Other             | 0.2480         | 0.4335        | 0.571         | 0.8354            |
| Male - Other           | 0.5890         | 0.4830        | 1.219         | 0.4420        | Male - Other               | 0.5200         | 0.4331        | 1.200         | 0.4530            |
| Generation             | estimate       | S.E.          | z-ratio       | P-value       | Generation                 | estimate       | S.E.          | z-ratio       | P-value           |
| Gen Z - Millennial     | <b>-0.6757</b> | <b>0.1700</b> | <b>-3.967</b> | <b>0.0010</b> | Gen Z - Millennial         | <b>-0.8670</b> | <b>0.1590</b> | <b>-5.439</b> | <b>&lt;0.0001</b> |
| Gen Z - Gen X          | <b>-0.8030</b> | <b>0.1840</b> | <b>-4.366</b> | <b>0.0002</b> | Gen Z - Gen X              | <b>-1.1340</b> | <b>0.1770</b> | <b>-6.412</b> | <b>&lt;0.0001</b> |
| Gen Z - Boomer II      | -0.5636        | 0.2180        | -2.582        | 0.1015        | Gen Z - Boomer II          | <b>-0.7060</b> | <b>0.2080</b> | <b>-3.401</b> | <b>0.0088</b>     |
| Gen Z - Boomer         | -0.5703        | 0.3090        | -1.844        | 0.4375        | Gen Z - Boomer             | -0.5570        | 0.2720        | -2.046        | 0.3162            |
| Gen Z - Post War       | 0.6116         | 0.8520        | 0.718         | 0.9798        | Gen Z - Post War           | -0.4780        | 0.6750        | -0.708        | 0.9810            |
| Millennial - Gen X     | -0.1273        | 0.1100        | -1.153        | 0.8588        | Millennial - Gen X         | -0.2670        | 0.1150        | -2.322        | 0.1849            |
| Millennial - Boomer II | 0.1121         | 0.1620        | 0.690         | 0.9831        | Millennial - Boomer II     | 0.1610         | 0.1590        | 1.009         | 0.9153            |
| Millennial - Boomer    | 0.1054         | 0.2730        | 0.386         | 0.9989        | Millennial - Boomer        | 0.3100         | 0.2380        | 1.305         | 0.7823            |
| Millennial - Post War  | 1.2873         | 0.8390        | 1.535         | 0.6414        | Millennial - Post War      | 0.3890         | 0.6620        | 0.588         | 0.9918            |
| Gen X - Boomer II      | 0.2394         | 0.1760        | 1.360         | 0.7513        | Gen X - Boomer II          | 0.4270         | 0.1750        | 2.437         | 0.1434            |

| Sloth Experiment     |         |        |        |        | Python Experiment    |        |        |       |        |
|----------------------|---------|--------|--------|--------|----------------------|--------|--------|-------|--------|
| Gen X - Boomer       | 0.2326  | 0.2810 | 0.827  | 0.9625 | Gen X - Boomer       | 0.5770 | 0.2490 | 2.319 | 0.1861 |
| Gen X - Post War     | 1.4146  | 0.8410 | 1.682  | 0.5440 | Gen X - Post War     | 0.6560 | 0.6660 | 0.985 | 0.9230 |
| Boomer II - Boomer   | -0.0067 | 0.3050 | -0.022 | 1.0000 | Boomer II - Boomer   | 0.1490 | 0.2720 | 0.550 | 0.9940 |
| Boomer II - Post War | 1.1752  | 0.8500 | 1.382  | 0.7377 | Boomer II - Post War | 0.2280 | 0.6750 | 0.338 | 0.9994 |
| Boomer - Post War    | 1.1820  | 0.8780 | 1.346  | 0.7590 | Boomer - Post War    | 0.0790 | 0.6980 | 0.113 | 1.0000 |

**Table S13.** Pairwise contrasts (estimate) with standard errors (S.E.) between predictor levels for agreement with zoo animal perception statement 23 (Zoo staff provide the animals in their care with a high quality of life) for the sloth experiment (left) and python experiment (right). For each predictor, results are averaged over levels of other predictors. p-values were adjusted using the Tukey method for comparing a family of six estimates for context, three estimates for gender, and six estimates for generation. Results for significant contrasts ( $p < 0.05$ ) are shown in bold.

| Sloth Experiment          |                |               |               |               | Python Experiment          |                |               |               |               |
|---------------------------|----------------|---------------|---------------|---------------|----------------------------|----------------|---------------|---------------|---------------|
| Context                   | estimate       | S.E.          | z-ratio       | P-value       | Context                    | estimate       | S.E.          | z-ratio       | P-value       |
| Control - Habitat         | 0.0062         | 0.1620        | 0.038         | 1.0000        | Control - Habitat          | -0.0894        | 0.1610        | -0.557        | 0.9937        |
| Control - Zoo Keeper      | -0.0442        | 0.1610        | -0.274        | 0.9998        | Control - Zoo Keeper       | -0.0223        | 0.1620        | -0.138        | 1.0000        |
| Control - Perch           | 0.0453         | 0.1610        | 0.281         | 0.9998        | Control - Perch            | -0.0246        | 0.1590        | -0.154        | 1.0000        |
| Control - Touch           | 0.0143         | 0.1600        | 0.089         | 1.0000        | Control - Touch            | -0.0152        | 0.1590        | -0.096        | 1.0000        |
| Control - Yoga            | 0.1078         | 0.1610        | 0.671         | 0.9852        | Control - Tourist Photo    | 0.2036         | 0.1610        | 1.264         | 0.8047        |
| Habitat - Zoo Keeper      | -0.0504        | 0.1610        | -0.312        | 0.9996        | Habitat - Zoo Keeper       | 0.0672         | 0.1610        | 0.417         | 0.9984        |
| Habitat - Perch           | 0.0391         | 0.1620        | 0.242         | 0.9999        | Habitat - Perch            | 0.0648         | 0.1590        | 0.407         | 0.9986        |
| Habitat - Touch           | 0.0081         | 0.1610        | 0.050         | 1.0000        | Habitat - Touch            | 0.0742         | 0.1590        | 0.468         | 0.9972        |
| Habitat - Yoga            | 0.1016         | 0.1610        | 0.630         | 0.9888        | Habitat - Tourist Photo    | 0.2930         | 0.1610        | 1.820         | 0.4525        |
| Zoo Keeper - Perch        | 0.0894         | 0.1610        | 0.557         | 0.9937        | Zoo Keeper - Perch         | -0.0024        | 0.1600        | -0.015        | 1.0000        |
| Zoo Keeper - Touch        | 0.0584         | 0.1600        | 0.365         | 0.9992        | Zoo Keeper - Touch         | 0.0071         | 0.1600        | 0.044         | 1.0000        |
| Zoo Keeper - Yoga         | 0.1519         | 0.1610        | 0.945         | 0.9346        | Zoo Keeper - Tourist Photo | 0.2258         | 0.1620        | 1.395         | 0.7299        |
| Perch - Touch             | -0.0310        | 0.1600        | -0.194        | 1.0000        | Perch - Touch              | 0.0094         | 0.1570        | 0.060         | 1.0000        |
| Perch - Yoga              | 0.0625         | 0.1610        | 0.389         | 0.9989        | Perch - Tourist Photo      | 0.2282         | 0.1600        | 1.429         | 0.7096        |
| Touch - Yoga              | 0.0935         | 0.1600        | 0.584         | 0.9921        | Touch - Tourist Photo      | 0.2188         | 0.1590        | 1.376         | 0.7418        |
| Gender                    | estimate       | S.E.          | z-ratio       | P-value       | Gender                     | estimate       | S.E.          | z-ratio       | P-value       |
| Female - Male             | -0.1140        | 0.0937        | -1.221        | 0.4406        | Female - Male              | -0.1770        | 0.0937        | -1.885        | 0.1430        |
| Female - Other            | 0.5360         | 0.5184        | 1.035         | 0.5549        | Female - Other             | 0.2810         | 0.4433        | 0.633         | 0.8019        |
| Male - Other              | 0.6510         | 0.5190        | 1.254         | 0.4215        | Male - Other               | 0.4570         | 0.4426        | 1.033         | 0.5559        |
| Generation                | estimate       | S.E.          | z-ratio       | P-value       | Generation                 | estimate       | S.E.          | z-ratio       | P-value       |
| <b>Gen Z - Millennial</b> | <b>-0.5287</b> | <b>0.1780</b> | <b>-2.968</b> | <b>0.0355</b> | <b>Gen Z - Millennial</b>  | <b>-0.5948</b> | <b>0.1640</b> | <b>-3.618</b> | <b>0.0040</b> |
| Gen Z - Gen X             | -0.5420        | 0.1920        | -2.821        | 0.0542        | Gen Z - Gen X              | -0.4577        | 0.1790        | -2.551        | 0.1096        |
| Gen Z - Boomer II         | -0.3225        | 0.2250        | -1.433        | 0.7066        | Gen Z - Boomer II          | -0.1836        | 0.2150        | -0.855        | 0.9570        |
| Gen Z - Boomer            | -0.3712        | 0.3270        | -1.136        | 0.8664        | Gen Z - Boomer             | -0.0737        | 0.2810        | -0.263        | 0.9998        |
| Gen Z - Post War          | 0.0876         | 0.8570        | 0.102         | 1.0000        | Gen Z - Post War           | -0.2234        | 0.6850        | -0.326        | 0.9995        |
| Millennial - Gen X        | -0.0133        | 0.1130        | -0.117        | 1.0000        | Millennial - Gen X         | 0.1371         | 0.1150        | 1.191         | 0.8413        |
| Millennial - Boomer II    | 0.2063         | 0.1640        | 1.258         | 0.8077        | Millennial - Boomer II     | 0.4113         | 0.1650        | 2.485         | 0.1284        |
| Millennial - Boomer       | 0.1575         | 0.2880        | 0.547         | 0.9942        | Millennial - Boomer        | 0.5211         | 0.2450        | 2.125         | 0.2740        |
| Millennial - Post War     | 0.6163         | 0.8420        | 0.732         | 0.9780        | Millennial - Post War      | 0.3715         | 0.6710        | 0.554         | 0.9938        |
| Gen X - Boomer II         | 0.2196         | 0.1790        | 1.229         | 0.8227        | Gen X - Boomer II          | 0.2741         | 0.1800        | 1.526         | 0.6473        |
| Gen X - Boomer            | 0.1708         | 0.2970        | 0.575         | 0.9926        | Gen X - Boomer             | 0.3840         | 0.2550        | 1.507         | 0.6596        |

| Sloth Experiment     |         |        |        |        | Python Experiment    |         |        |        |        |
|----------------------|---------|--------|--------|--------|----------------------|---------|--------|--------|--------|
| Gen X - Post War     | 0.6296  | 0.8450 | 0.745  | 0.9762 | Gen X - Post War     | 0.2343  | 0.6750 | 0.347  | 0.9993 |
| Boomer II - Boomer   | -0.0488 | 0.3190 | -0.153 | 1.0000 | Boomer II - Boomer   | 0.1098  | 0.2810 | 0.391  | 0.9988 |
| Boomer II - Post War | 0.4101  | 0.8540 | 0.480  | 0.9968 | Boomer II - Post War | -0.0398 | 0.6850 | -0.058 | 1.0000 |
| Boomer - Post War    | 0.4589  | 0.8860 | 0.518  | 0.9955 | Boomer - Post War    | -0.1496 | 0.7080 | -0.211 | 0.9999 |



**Table S14.** Pairwise contrasts (estimate) with standard errors (S.E.) between predictor levels for agreement with zoo animal perception statement 24 (Keeping sloths (pythons) in zoos, no matter how large and attractive their surroundings are, strikes me as cruel and unusual) for the sloth experiment (left) and python experiment (right). For each predictor, results are averaged over levels of other predictors. p-values were adjusted using the Tukey method for comparing a family of six estimates for context, three estimates for gender, and six estimates for generation.

| Sloth Experiment       |          |        |         |         | Python Experiment          |          |        |         |         |
|------------------------|----------|--------|---------|---------|----------------------------|----------|--------|---------|---------|
| Context                | estimate | S.E.   | z-ratio | P-value | Context                    | estimate | S.E.   | z-ratio | P-value |
| Control - Habitat      | -0.0054  | 0.1550 | -0.035  | 1.0000  | Control - Habitat          | 0.0707   | 0.1520 | 0.465   | 0.9973  |
| Control - Zoo Keeper   | 0.0760   | 0.1540 | 0.493   | 0.9964  | Control - Zoo Keeper       | 0.0246   | 0.1540 | 0.160   | 1.0000  |
| Control - Perch        | -0.0217  | 0.1550 | -0.140  | 1.0000  | Control - Perch            | 0.0260   | 0.1500 | 0.173   | 1.0000  |
| Control - Touch        | -0.1965  | 0.1540 | -1.276  | 0.7982  | Control - Touch            | 0.0738   | 0.1520 | 0.487   | 0.9966  |
| Control - Yoga         | -0.1227  | 0.1550 | -0.793  | 0.9688  | Control - Tourist Photo    | -0.0923  | 0.1520 | -0.606  | 0.9906  |
| Habitat - Zoo Keeper   | 0.0815   | 0.1530 | 0.531   | 0.9949  | Habitat - Zoo Keeper       | -0.0461  | 0.1540 | -0.300  | 0.9997  |
| Habitat - Perch        | -0.0162  | 0.1540 | -0.105  | 1.0000  | Habitat - Perch            | -0.0448  | 0.1510 | -0.297  | 0.9997  |
| Habitat - Touch        | -0.1911  | 0.1530 | -1.248  | 0.8129  | Habitat - Touch            | 0.0031   | 0.1520 | 0.020   | 1.0000  |
| Habitat - Yoga         | -0.1173  | 0.1540 | -0.760  | 0.9740  | Habitat - Tourist Photo    | -0.1630  | 0.1520 | -1.070  | 0.8935  |
| Zoo Keeper - Perch     | -0.0977  | 0.1540 | -0.635  | 0.9884  | Zoo Keeper - Perch         | 0.0014   | 0.1530 | 0.009   | 1.0000  |
| Zoo Keeper - Touch     | -0.2725  | 0.1530 | -1.784  | 0.4763  | Zoo Keeper - Touch         | 0.0492   | 0.1540 | 0.320   | 0.9996  |
| Zoo Keeper - Yoga      | -0.1987  | 0.1540 | -1.290  | 0.7909  | Zoo Keeper - Tourist Photo | -0.1169  | 0.1540 | -0.757  | 0.9746  |
| Perch - Touch          | -0.1748  | 0.1540 | -1.139  | 0.8653  | Perch - Touch              | 0.0479   | 0.1500 | 0.319   | 0.9996  |
| Perch - Yoga           | -0.1011  | 0.1550 | -0.652  | 0.9869  | Perch - Tourist Photo      | -0.1182  | 0.1510 | -0.784  | 0.9703  |
| Touch - Yoga           | 0.0738   | 0.1540 | 0.480   | 0.9968  | Touch - Tourist Photo      | -0.1661  | 0.1520 | -1.094  | 0.8839  |
| Gender                 | estimate | S.E.   | z-ratio | P-value | Gender                     | estimate | S.E.   | z-ratio | P-value |
| Female - Male          | 0.1100   | 0.0898 | 1.224   | 0.4391  | Female - Male              | 0.0474   | 0.0888 | 0.534   | 0.8545  |
| Female - Other         | 0.5540   | 0.5022 | 1.104   | 0.5116  | Female - Other             | 0.4441   | 0.4178 | 1.063   | 0.5372  |
| Male - Other           | 0.4450   | 0.5027 | 0.884   | 0.6503  | Male - Other               | 0.3966   | 0.4171 | 0.951   | 0.6081  |
| Generation             | estimate | S.E.   | z-ratio | P-value | Generation                 | estimate | S.E.   | z-ratio | P-value |
| Gen Z - Millennial     | 0.0999   | 0.1650 | 0.605   | 0.9907  | Gen Z - Millennial         | 0.0466   | 0.1550 | -0.301  | 0.9997  |
| Gen Z - Gen X          | 0.1182   | 0.1790 | 0.661   | 0.9861  | Gen Z - Gen X              | -0.1928  | 0.1700 | -1.135  | 0.8669  |
| Gen Z - Boomer II      | 0.1426   | 0.2140 | 0.666   | 0.9856  | Gen Z - Boomer II          | -0.1847  | 0.2060 | -0.898  | 0.9470  |
| Gen Z - Boomer         | 0.1696   | 0.3060 | 0.555   | 0.9938  | Gen Z - Boomer             | -0.3680  | 0.2690 | -1.370  | 0.7450  |
| Gen Z - Post War       | 0.0919   | 0.8230 | 0.112   | 1.0000  | Gen Z - Post War           | 0.0035   | 0.7170 | 0.005   | 1.0000  |
| Millennial - Gen X     | 0.0183   | 0.1080 | 0.169   | 1.0000  | Millennial - Gen X         | -0.1462  | 0.1100 | -1.334  | 0.7662  |
| Millennial - Boomer II | 0.0427   | 0.1600 | 0.266   | 0.9998  | Millennial - Boomer II     | -0.1381  | 0.1590 | -0.866  | 0.9545  |
| Millennial - Boomer    | 0.0697   | 0.2710 | 0.257   | 0.9998  | Millennial - Boomer        | -0.3214  | 0.2350 | -1.368  | 0.7465  |
| Millennial - Post War  | -0.0080  | 0.8100 | -0.010  | 1.0000  | Millennial - Post War      | 0.0502   | 0.7050 | 0.071   | 1.0000  |
| Gen X - Boomer II      | 0.0243   | 0.1740 | 0.140   | 1.0000  | Gen X - Boomer II          | 0.0082   | 0.1730 | 0.047   | 1.0000  |
| Gen X - Boomer         | 0.0513   | 0.2790 | 0.184   | 1.0000  | Gen X - Boomer             | -0.1752  | 0.2450 | -0.716  | 0.9801  |

| Sloth Experiment     |         |        |        |        | Python Experiment    |         |        |        |        |
|----------------------|---------|--------|--------|--------|----------------------|---------|--------|--------|--------|
| Gen X - Post War     | -0.0264 | 0.8130 | -0.032 | 1.0000 | Gen X - Post War     | 0.1964  | 0.7090 | 0.277  | 0.9998 |
| Boomer II - Boomer   | 0.0270  | 0.3030 | 0.089  | 1.0000 | Boomer II - Boomer   | -0.1833 | 0.2710 | -0.677 | 0.9845 |
| Boomer II - Post War | -0.0507 | 0.8220 | -0.062 | 1.0000 | Boomer II - Post War | 0.1882  | 0.7180 | 0.262  | 0.9998 |
| Boomer - Post War    | -0.0777 | 0.8510 | -0.091 | 1.0000 | Boomer - Post War    | 0.3715  | 0.7390 | 0.503  | 0.9961 |
